# Supplementary material
Source: publisher site journal article supplement (https://www.dovepress.com/get_supplementary_file.php?f=460877.docx)
Supplement: Supplementary file 1 [file get_supplementary_file.php]

**Supplementary Figure 1** Types of intentional medication discrepancies

The percentage of each episode is given in parentheses. The percentage was calculated for documented and undocumented medication discrepancies. Total episodes of documented and undocumented medication discrepancies are 1,064 and 281, respectively.

aDose, frequency, and formulation changes were categorized as ‘others’.

**Supplementary Figure 2** Pharmacists' survey on the physicians’ real-time documentation of the medication changes: 5-point Likert scale responses

**Supplementary Table 1** Classification of changed medications during hospitalization

|  | **Addition** | **Discontinuation** | **Dose change** | **Administration**  **change** | **Frequency**  **change** | **Formulation**  **change** | **Total** |
| --- | --- | --- | --- | --- | --- | --- | --- |
| **Anti-infectives** | **286** | 3 | 0 | 1 | 3 | 0 | 293 |
| **Anti-hypertensives** | 47 | 137 | 15 | 0 | 1 | 0 | 200 |
| **Anti-diabetics** | 27 | 116 | 14 | 0 | 3 | 0 | 160 |
| **Nervous system drugs** | 41 | 71 | 6 | 2 | 0 | 0 | 120 |
| **Anti-coagulants** | 26 | 71 | 1 | 0 | 0 | 1 | 99 |
| **Corticosteroids** | 30 | 3 | 17 | 6 | 0 | 0 | 56 |
| **Lipid-modifying drugs** | 3 | 44 | 1 | 0 | 0 | 0 | 48 |
| **Urologicals** | 22 | 16 | 1 | 0 | 0 | 0 | 39 |
| **Anti-neoplastics** | 17 | 17 | 0 | 0 | 0 | 0 | 34 |
| **Obstructive airway**  **disease drugs** | 11 | 5 | 0 | 0 | 0 | 0 | 16 |
| **Thyroid drugs** | 5 | 1 | 1 | 0 | 0 | 0 | 7 |
| **Anti-hemorrhagics** | 5 | 0 | 0 | 0 | 0 | 0 | 5 |
| **Anti-gout drugs** | 3 | 3 | 0 | 0 | 0 | 0 | 6 |
| **Gastrointestinal drugs** | 3 | 1 | 0 | 0 | 0 | 0 | 4 |
| **Muscle relaxants** | 1 | 2 | 0 | 0 | 0 | 0 | 3 |
| **Pituitary and**  **hypothalamic hormones** | 2 | 0 | 0 | 0 | 0 | 0 | 2 |
| **Total** | 529 | 490 | 56 | 9 | 7 | 1 | 1,092 |

Classification of changed medications was based on World Health Organization Anatomical Therapeutic Chemical code system.

**Supplementary Table 2** Pharmacists' survey on the physicians’ real-time documentation of the medication changes: open-ended responses

| Understanding | Easy to understand doctor's intention for medication changes, without direct or indirect contact to physician. |
| --- | --- |
| It is possible to grasp the point of view of clinician and changes in drug history during hospitalization at a glance which is helpful both understanding patients and reviewing prescriptions |
| It was helpful to clearly and quickly identify drug changes according to changes in laboratory values. |
| Pharmacists get benefits when the goal of treatment and the direction of drug treatment were presented by physicians |
| If there is a doctor's record that the drug discontinuation and change are due to AKI, the pharmacist can focus on the patient's decreased renal function, identify other causative drugs, and exclude nephrotoxic drugs in the recommendation lists. It helps to understand the overall condition of the patient |
| It helped to understand the drug changes after admission through the documentation on substitutes with the same ingredient for self-medication that was not available in the hospital. |
| Physicians' documentation on medication history allowed me to understand the course of treatment and identify side effects of the medication. |
| Medication adjustment history helps to accurately understand changes in the patient's condition and treatment plan. |
| History of antibiotic use, the reason for holding self-medication, etc. are helpful in identifying patient's condition |
| By keeping a record of the intention of stopping self-medication, it was helpful to identify the current patient's problem. |
| I was able to check the patient's condition that I hadn't been able to figure out through the record on the chart. |
| Physicians' notes on drug changes helped to timely understand the patient in terms of clinical conditions or laboratory findings |
| Documentation of the side effects of a specific drug in the patient's order chart increased the recognition of caution, at a glance, when using the drug or the same class. |
| Communications | It is possible to understand the doctor's intent for drug treatment for changes in self-medication, and communication is possible without using additional messenger or direct face to face confirmation. |
| It is possible to check whether the change in prescription is the true intention of the attending physician or a simple error so that unnecessary confirmation procedures can be avoided and more important information can be communicated. |
| Among the various information in the medical record, the drug information was well organized, so it was good to know the relevance of the doctor's intention and prescription. |
| Expectations (target level of certain laboratory values or plan of durations, etc.) of drug treatment were briefly documented, so it was possible to know the intention of the attending physician |
| Because the patient's condition can be better understood according to the medication change record, it is also helpful when consulting with the attending physician during rounds. |
| Referring to the schedule for changing doses was helpful as it made it easier for the pharmacists to recognize the desired medication schedule of attending physician |
| The documentation also contained the drug administration plan for the near future, therefore, it was possible to share the treatment process between the pharmacists and the attending physician, and the pharmacists could determine whether the current prescription was intentional or mistaken. |
| It reduces the time required for intervention and enables effective communication. There was a case in which anti-hypertensive medication and midodrine which may cause supine hypertension were prescribed to a patient with cerebral hemorrhage, and there was a comment that midodrine was used for the purpose of preventing low blood pressure only during physical therapy, which helped to understand the intention of the prescription. I was able to reduce the time required to closely examine the patient's clinical progress or to contact them separately. |
| It was good to know for what purpose the treatment plan was established. |
| I was able to reduce unnecessary communication by figuring out what the doctor intended to change the medicine and what kind of self-medication he prescribed instead. |
| Documentation with departmentally arranged problems and corresponding drug changes improved my understanding of drug changes in patients. |
| It was good to be able to figure out the intention of changing the prescription without the process of asking the attending physician |
| Time efficiency | Does not significantly affect the time required to identify patient drug use history |
| Time was shortened because it was possible to see at a glance which prescriptions were changed and the reasons for the changes. |
| You can check the necessary information hidden in the medical record at a glance without looking for it like a hidden picture. When you need to check information clearly because it is sometimes mixed with past records in the medical record, you can save a lot of time and work with just one well-organized record. Efficiency can be increased. |
| Because the indications for drug treatment can be easily identified, the time to identify patients has been shortened. |
| Critically ill patients use so many drugs that it takes a long time to identify drugs. However, if records of changes in medications are written, such as the progress of hospitalization, the time is shortened and it is of great help in understanding the overall situation of the patient. |
| Because the record of drug changes can be checked immediately, the time to additionally check other department reply papers or initial nursing records can be reduced. |
| When there was no drug change documentation, I had to check all the medication history, but the time was shortened because I could quickly check at a glance through the record. |
| You can know when the patient's condition has changed, and it is easy to figure out what records to look at, reducing the patient review time. |
| In cases where the drug had been discontinued due to drug-related problems, we were able to quickly identify what problems the current patient was having. |
| It helped me to understand the patient's condition and intention to change the medication, which saved me time. |
| The time was shortened by the documentation of both the drug change and the date of the drug change together. However, in some cases, it took more time to determine whether there was an error in the documentation. |
| In order to find the reason for a sudden change in prescription, it was not necessary to search not only previous hospitalization records but also outpatient records and nursing diaries, reducing the time to identify patients. |
